# Supplementary material for: A novel approach for the synthesis of ultrathin silica-coated iron oxide nanocubes decorated with silver nanodots (Fe3O4/SiO2/Ag) and their superior catalytic reduction of 4-nitroaniline
Source: Royal Society of Chemistry journal article supplement (doi:10.1039/c5nr02680f), 2015-01-01
Supplement: c5nr02680f1.pdf [file c5nr02680f1.pdf]

## Supplementary information

### **A novel approach for the synthesis of ultrathin silica-coated iron oxide nanocubes decorated with silver nanodots ( $\text{Fe}_3\text{O}_4/\text{SiO}_2/\text{Ag}$ ) and their superior catalytic reduction of 4-nitroaniline**

Mohamed Abbas<sup>1,2</sup>, Sri Ramulu Torati<sup>1</sup>, CheolGi Kim<sup>1</sup>

<sup>1</sup>Department of Emerging Materials Science, Daegu Gyeongbuk Institute of Science and Technology (DGIST),  
Daegu, South Korea

<sup>2</sup>Ceramics Department, National Research Centre, El-Bohous Street, 12622 Cairo, Egypt

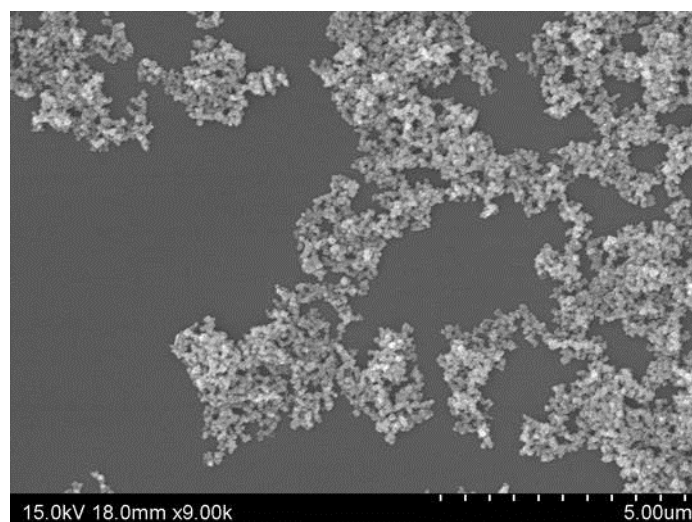

Fig. S1 SEM image for  $\text{Fe}_3\text{O}_4$  nanocubes

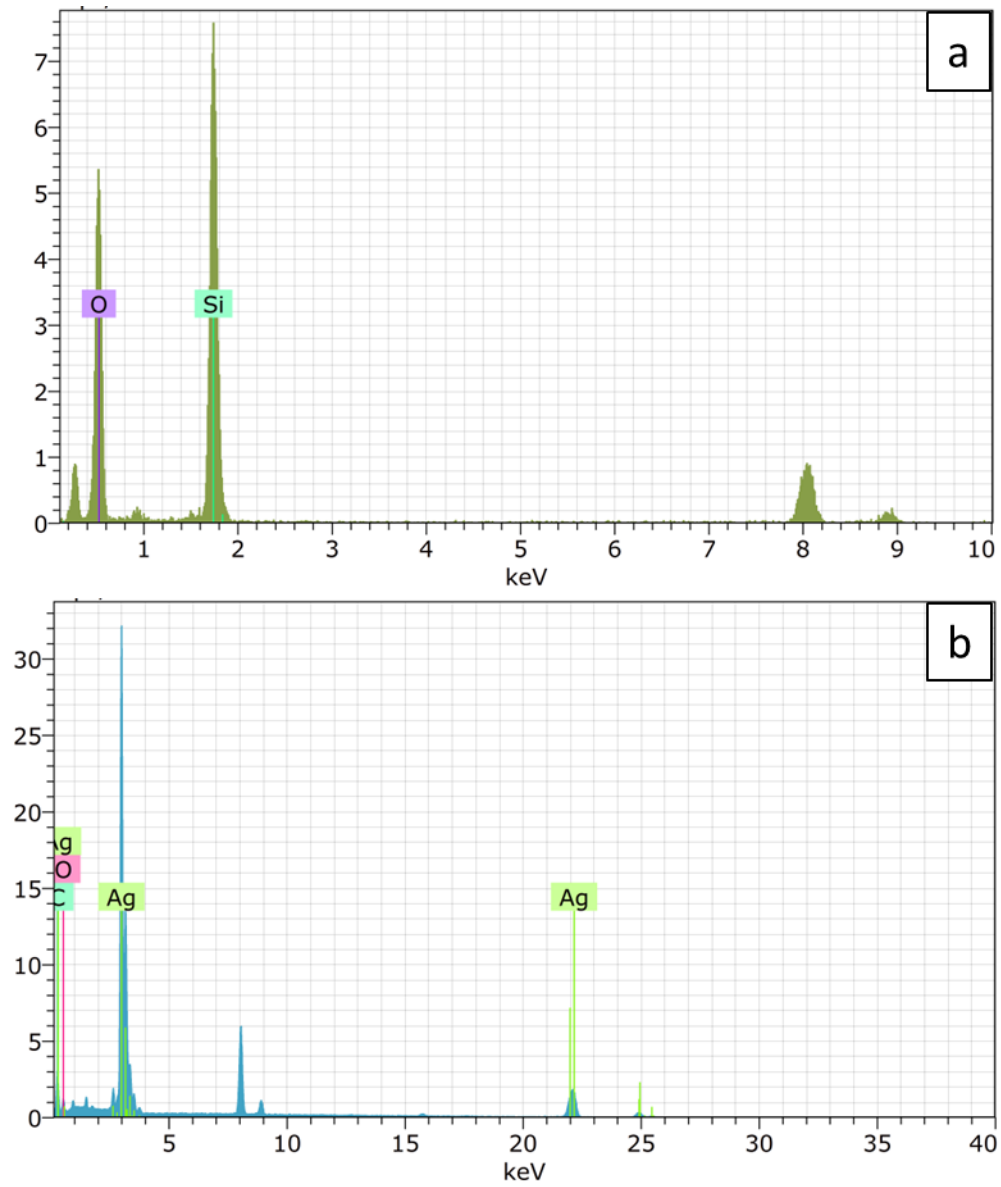

Fig. S2 EDS analysis data for (a) SiO<sub>2</sub> NPs and (b) Ag NPs.

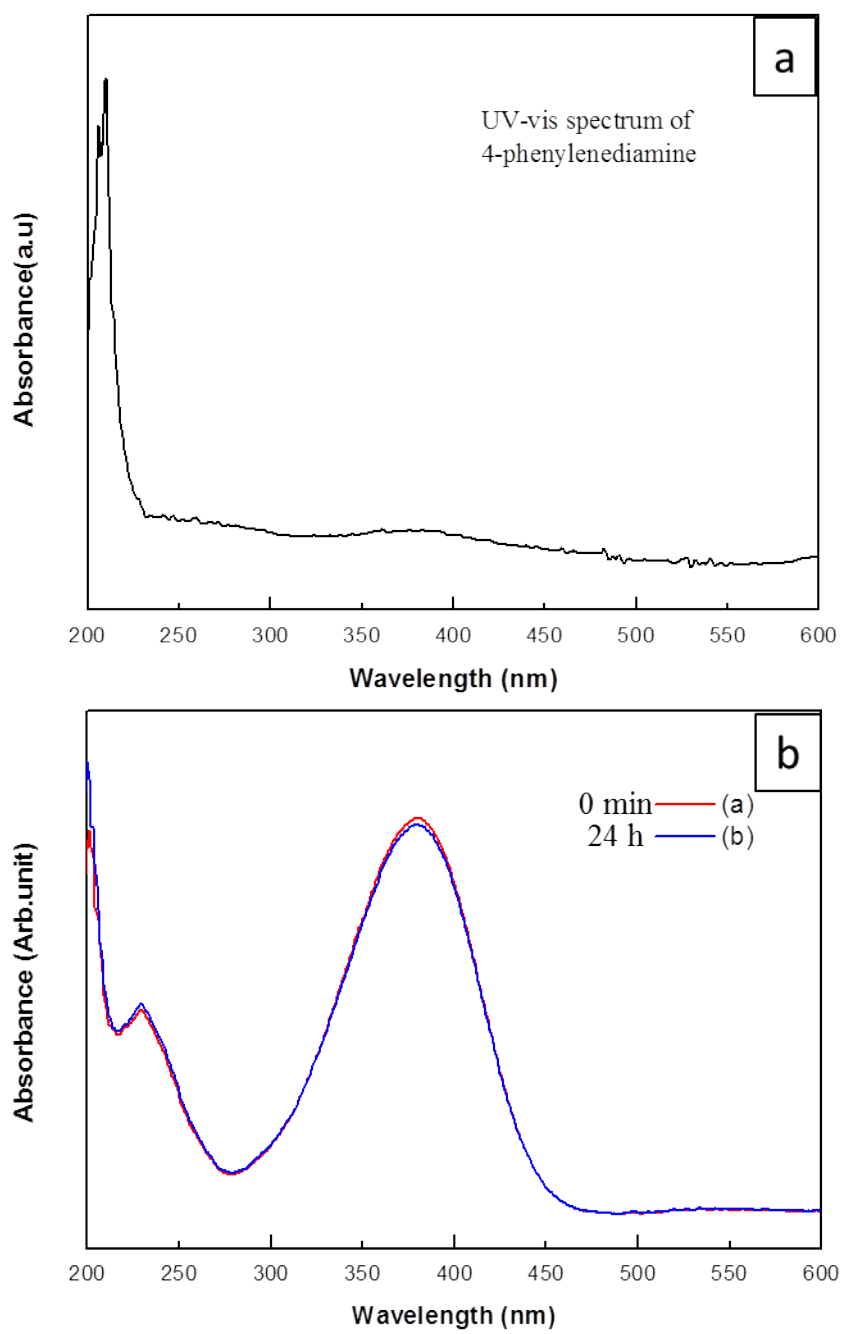

Fig. S3 UV-vis spectrum of (a) 4-phenylenediamine and (b) the reduction of 4 nitroaniline with only  $\text{NaBH}_4$  for 24 h reaction time.

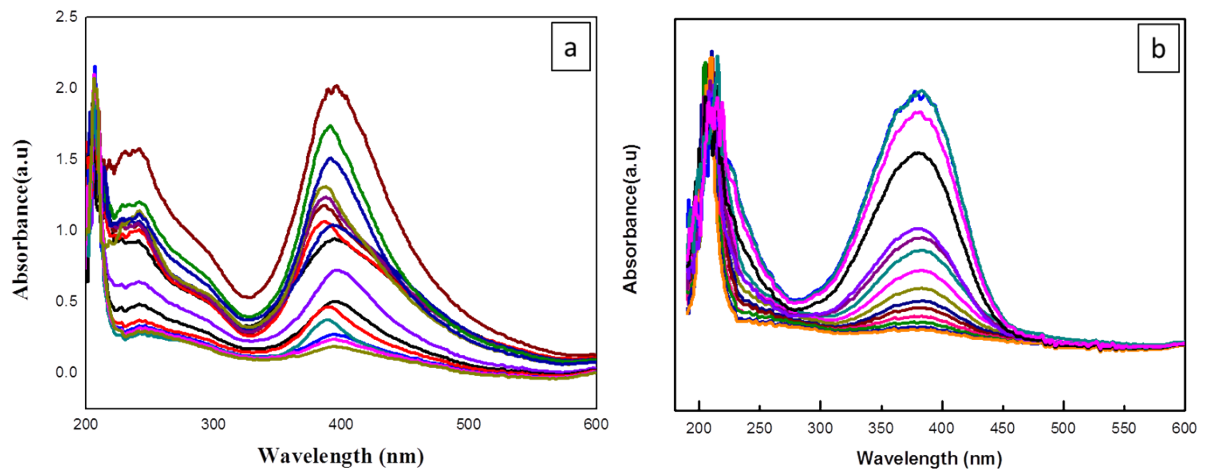

Fig. S4 UV-visible spectra for the reduction reaction of a 4-nitroaniline compound by (a) SiO<sub>2</sub>/Ag NPs and (b) Ag NPs.
